# Supplementary material for: Effect of electroactive phase transformation on electron structure and dielectric properties of uniaxial stretching poly(vinylidene fluoride) films
Source: Royal Society of Chemistry journal article supplement (doi:10.1039/c3ra43966f), 2013-01-01
Supplement: c3ra43966f.pdf [file c3ra43966f.pdf]

*Electronic Supplementary Information for*  
**Effect of electroactive phase transformation on electron  
structure and dielectric properties of uniaxial stretching  
poly(vinylidene fluoride) films**

**Hui-Jian Ye, Li Yang, Wen-Zhu Shao, Song-Bai Sun, Liang Zhen\***

School of Materials Science and Engineering, Harbin Institute of Technology, Harbin  
150001, People's Republic of China

\* To whom correspondence should be addressed. Fax: 86-451-86413922; Tel:  
86-451-86412133; E-mail: lzhen@hit.edu.cn.

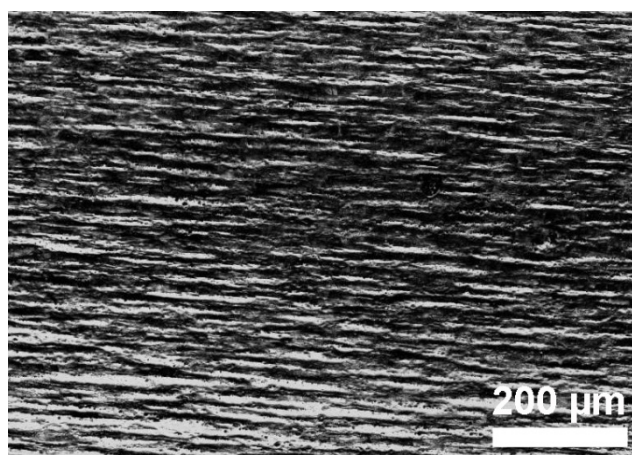

**Fig. S1** CLSM image showing the orientation in stretched PVDF films.
